# Supplementary material
Source: publisher figshare collection journal article supplement (https://tandf.figshare.com/ndownloader/files/26043703)
Supplement: Supplementary file 1 [file 26043703]

## Sheet: Sheet1
Detailed sighting records for cetaceans during seismic survey in and around the New Caledonia Basin between December 2015 – March 2016.
Longitude	Latitude	Species	Date	Confidence	Method	Depth (m)	Total	Distance of initial observation	Airgun status
171.486	-37.6697	Bryde's whale	2015-12-20	Probable	visual	1730	1	4860	not active
171.548	-38.0381	Common dolphin	2015-12-22	Probable	visual	1630	20	50	not active
171.453	-37.8956	Sperm whale	2015-12-23	Certain	PAM	1655	1		active
167.898	-35.2658	Sperm whale	2015-12-26	Certain	visual	2628	2	3290	active
172.852	-36.4847	Sperm whale	2015-12-31	Certain	visual	1517	1	2730	not active
172.881	-36.4967	Blue whale	2015-12-31	Probable	visual	1550	2	1360	not active
172.938	-36.5517	Sperm whale	2015-12-31	Certain	visual	1450	1	2330	not active
173.536	-36.5928	Common dolphin	2015-12-31	Certain	visual	980	5	300	not active
169.976	-37.0458	Blue whale	2016-01-03	Probable	visual	2100	1	3677	active
173.169	-34.5189	Common dolphin	2016-01-10	Certain	visual	120	20	959	not active
173.251	-34.5703	Common dolphin	2016-01-10	Certain	visual	123	50	300	not active
168.934	-36.8789	Sperm whale	2016-01-13	Certain	visual	1823	2	2004	active
168.877	-36.2742	Sperm whale	2016-01-17	Certain	visual	2400	3	2992	active
173.669	-38.8392	Long-finned pilot whale	2016-01-21	Probable	visual	100	5	2327	not active
172.887	-38.4433	Risso's dolphin	2016-01-21	Certain	visual	661	5	3289	not active
172.101	-38.0572	Blue whale	2016-01-21	Certain	visual	1500	1	743	not active
171.968	-37.9942	Blue whale	2016-01-21	Probable	visual	1615	1	960	not active
168.511	-36.3675	Sperm whale	2016-01-23	Certain	visual	2400	1	743	active
165.005	-33.7908	Sperm whale	2016-01-26	Certain	visual	3040	2	4862	active
165.771	-35.2103	False killer whale	2016-01-31	Probable	visual	1445	1	743	not active
165.86	-35.3172	Sperm whale	2016-01-31	Certain	visual	1417	2	2327	not active
169.055	-34.9856	Long-finned pilot whale	2016-02-11	Certain	visual	1324	19	960	not active
165.759	-34.7606	Sperm whale	2016-02-19	Certain	visual	2157	2	2327	active
166.397	-34.3761	Sperm whale	2016-02-19	Certain	visual	2944	5	2327	active
166.518	-34.3169	Sperm whale	2016-02-19	Probable	visual	2946	3	2327	active
165.469	-34.6347	Sperm whale	2016-02-21	Certain	PAM	2057	1		not active
165.286	-34.6853	Sperm whale	2016-02-21	Certain	PAM	1726	1		not active
165.102	-34.6036	Sperm whale	2016-02-21	Certain	visual	1645	2	1626	not active
171.555	-37.6272	Blue whale	2016-02-23	Probable	visual	1812	1	800	not active
171.884	-37.8003	Blue whale	2016-02-23	Certain	visual	1696	1	1626	not active
172.366	-38.1742	Blue whale	2016-02-23	Probable	visual	1520	2	3678	not active
165.711	-32.6294	Sperm whale	2016-03-01	Certain	PAM	3129	1		active
165.079	-33.6436	Sperm whale	2016-03-10	Certain	PAM	3000	1		active
164.9	-31.55	Sperm whale	2016-03-23	Certain	visual	2200	4	2203	active
165.918	-34.485	Long-finned pilot whale	2016-03-26	Probable	visual	2700	36	417	not active
171.691	-37.7383	Blue whale	2016-03-28	Certain	visual	1680	2	3124	not active
